# Supplementary material for: The Commute Trip-Sharing Problem
Source: Atypon-hosted journal article supplement (doi:10.1287/trsc.2019.0969), 2020-10-02
Supplement: trsc.2019.0969.sm1.pdf [file trsc.2019.0969.sm1.pdf]

# The Commute Trip Sharing Problem (Online Supplement)

Mohd. Hafiz Hasan

University of Michigan, Ann Arbor, Michigan 48109, hasanm@umich.edu

Pascal Van Hentenryck

Georgia Institute of Technology, Atlanta, Georgia 30332, pascal.vanhentenryck@isye.gatech.edu

Antoine Legrain

Polytechnique Montréal, Montréal, Québec H3T 1J4, antoine.legrain@polymtl.ca

---

## Appendix. Computational Results

Results of the REA are presented in Table 1. The first three columns show the cluster size, vehicle capacity, and cluster ID which characterize each problem instance. The next column lists the number of columns generated by the algorithm, while the following three show the results of solving the MP as a MIP. They show the vehicle count, the total distance of selected routes, and the optimality gap of the MIP solution. Finally, the remaining two columns display computation times of the route enumeration phase and of the entire algorithm including MIP solve times.

Table 2 shows results of the BPA. Similar to Table 1, the first three columns list the cluster size, vehicle capacity, and cluster ID for each problem instance. The next two columns present the total number of unique feasible edges from all inbound and outbound graphs to further characterize the size of the problem instances, while the following two show the total number of tree nodes explored and columns generated by the algorithm. The next two display the results in terms of the vehicle count and the total distance of selected routes. The following two columns list optimality gaps of the MIP solution at the root node and of the best feasible solution, while the next lists the integrality gap of the best feasible solution, which is the relative gap between its objective value and  $z^*$ . Finally, the remaining four columns show computation times for the RMP to converge, for finding the MIP solution at the root node, for arriving at the best feasible solution, and for executing the entire algorithm.

Results for the instances testing scalability are summarized in Tables 3 and 4 for the REA and the BPA respectively. Both tables list the same quantities as those listed in Tables 1 and 2 respectively.

The results for the root-node heuristic are summarized in Table 5. The first two columns show the cluster size and ID of each problem instance. The next set of five columns list the results of the heuristic which enforces forbidden paths. They show the number of columns generated, the resulting vehicle count, its optimality gap, and the times spent on solving the RMP and its MIP. The next set of six columns display the same information for the heuristic which relaxes forbidden paths, with an additional column showing the number of infeasible columns it generated.

**Table 1 Results of REA Scalability with Increasing Vehicle Capacity ( $\Delta = 10$  mins,  $R = 0.5$ ).**

| Cluster size | Vehicle capacity | Cluster ID | Column # | Vehicle # | Total distance (m) | Optimality gap (%) | Wall time (s)     |       |
|--------------|------------------|------------|----------|-----------|--------------------|--------------------|-------------------|-------|
|              |                  |            |          |           |                    |                    | Route enumeration | Total |
|              |                  | C0-75      | 508      | 47        | 356296             | 0.00               | 11                | 11    |
|              |                  | C2-75      | 1946     | 40        | 643541             | 0.00               | 9                 | 9     |
|              |                  | C3-75      | 2068     | 38        | 487061             | 0.00               | 11                | 11    |
|              |                  | C4-75      | 1483     | 43        | 398265             | 0.00               | 10                | 10    |
|              |                  | C5-75      | 274      | 61        | 230460             | 0.00               | 9                 | 9     |
|              |                  | C6-75      | 3071     | 36        | 451262             | 0.00               | 11                | 12    |
|              |                  | C7-75      | 690      | 46        | 437743             | 0.00               | 10                | 10    |
|              |                  | C8-75      | 1350     | 37        | 487561             | 0.00               | 10                | 10    |
|              |                  | C9-75      | 3926     | 31        | 328525             | 0.00               | 10                | 37    |
|              |                  | C10-75     | 4137     | 32        | 527544             | 0.00               | 13                | 14    |
|              |                  | C11-75     | 866      | 47        | 443770             | 0.00               | 12                | 12    |
|              | 4                | C12-75     | 592      | 46        | 298162             | 0.00               | 11                | 11    |
|              |                  | C13-75     | 2143     | 37        | 481869             | 0.00               | 12                | 12    |
|              |                  | C14-75     | 863      | 47        | 301108             | 0.00               | 10                | 10    |
|              |                  | C15-75     | 1512     | 36        | 460087             | 0.00               | 10                | 10    |
|              |                  | C17-75     | 457      | 50        | 348581             | 0.00               | 9                 | 9     |
|              |                  | C19-75     | 496      | 57        | 245827             | 0.00               | 10                | 10    |
|              |                  | C20-75     | 752      | 46        | 420825             | 0.00               | 10                | 10    |
|              |                  | C22-75     | 2288     | 40        | 472247             | 0.00               | 10                | 11    |
|              |                  | C23-75     | 1574     | 36        | 385434             | 0.00               | 9                 | 10    |
|              |                  | C24-75     | 1926     | 37        | 425807             | 0.00               | 11                | 12    |
|              |                  | C26-75     | 468      | 52        | 333692             | 0.00               | 9                 | 9     |
|              |                  | C28-75     | 750      | 44        | 293838             | 0.00               | 10                | 10    |
|              |                  | C29-75     | 2541     | 32        | 548779             | 0.00               | 10                | 11    |
|              |                  | C0-75      | 509      | 47        | 356296             | 0.00               | 306               | 306   |
|              |                  | C2-75      | 2014     | 40        | 643540             | 0.00               | 316               | 316   |
|              |                  | C3-75      | 2117     | 38        | 487061             | 0.00               | 341               | 342   |
|              |                  | C4-75      | 1559     | 43        | 398216             | 0.00               | 326               | 326   |
|              |                  | C5-75      | 274      | 61        | 230460             | 0.00               | 264               | 264   |
|              |                  | C6-75      | 3331     | 35        | 450414             | 0.00               | 355               | 356   |
|              |                  | C7-75      | 690      | 46        | 437743             | 0.00               | 316               | 316   |
|              |                  | C8-75      | 1352     | 37        | 487245             | 0.00               | 335               | 335   |
|              |                  | C9-75      | 4110     | 31        | 327993             | 0.00               | 346               | 378   |
|              |                  | C10-75     | 5589     | 32        | 526188             | 0.00               | 352               | 354   |
|              |                  | C11-75     | 870      | 47        | 443770             | 0.00               | 300               | 300   |
|              |                  | C12-75     | 592      | 46        | 298162             | 0.00               | 308               | 308   |
| 75           | 5                | C13-75     | 2207     | 37        | 479166             | 0.00               | 351               | 351   |
|              |                  | C14-75     | 867      | 47        | 301108             | 0.00               | 304               | 304   |
|              |                  | C15-75     | 1522     | 36        | 460087             | 0.00               | 335               | 335   |
|              |                  | C17-75     | 457      | 50        | 348581             | 0.00               | 293               | 293   |
|              |                  | C19-75     | 496      | 57        | 245827             | 0.00               | 279               | 279   |
|              |                  | C20-75     | 752      | 46        | 420825             | 0.00               | 309               | 309   |
|              |                  | C22-75     | 2344     | 40        | 472040             | 0.00               | 347               | 348   |
|              |                  | C23-75     | 1628     | 35        | 379234             | 0.00               | 306               | 307   |
|              |                  | C24-75     | 1996     | 37        | 425806             | 0.00               | 339               | 339   |
|              |                  | C26-75     | 468      | 52        | 333692             | 0.00               | 292               | 292   |
|              |                  | C28-75     | 751      | 44        | 293838             | 0.00               | 315               | 315   |
|              |                  | C29-75     | 2594     | 32        | 543850             | 0.00               | 350               | 351   |
|              |                  | C0-75      | 509      | 47        | 356296             | 0.00               | 4761              | 4761  |
|              |                  | C2-75      | 2016     | 40        | 643540             | 0.00               | 5109              | 5110  |
|              |                  | C3-75      | 2120     | 38        | 487061             | 0.00               | 6009              | 6009  |
|              |                  | C4-75      | 1562     | 43        | 398216             | 0.00               | 5375              | 5375  |
|              |                  | C5-75      | 274      | 61        | 230460             | 0.00               | 3220              | 3220  |
|              |                  | C6-75      | 3406     | 35        | 450414             | 0.00               | 6341              | 6341  |
|              |                  | C7-75      | 690      | 46        | 437743             | 0.00               | 6135              | 6135  |
|              |                  | C8-75      | 1352     | 37        | 487245             | 0.00               | 7172              | 7172  |
|              |                  | C9-75      | 4116     | 31        | 327993             | 0.00               | 7893              | 7916  |
|              |                  | C10-75     | 6571     | 32        | 525115             | 0.00               | 7480              | 7482  |
|              |                  | C11-75     | 870      | 47        | 443770             | 0.00               | 5413              | 5413  |
|              |                  | C12-75     | 592      | 46        | 298162             | 0.00               | 5206              | 5206  |
|              | 6                | C13-75     | 2209     | 37        | 479166             | 0.00               | 6164              | 6164  |
|              |                  | C14-75     | 867      | 47        | 301108             | 0.00               | 4658              | 4658  |
|              |                  | C15-75     | 1522     | 36        | 460087             | 0.00               | 5668              | 5668  |
|              |                  | C17-75     | 457      | 50        | 348581             | 0.00               | 4147              | 4147  |
|              |                  | C19-75     | 496      | 57        | 245827             | 0.00               | 4000              | 4000  |
|              |                  | C20-75     | 752      | 46        | 420825             | 0.00               | 4983              | 4983  |
|              |                  | C22-75     | 2345     | 40        | 472040             | 0.00               | 5961              | 5961  |
|              |                  | C23-75     | 1629     | 35        | 379234             | 0.00               | 5008              | 5008  |
|              |                  | C24-75     | 2001     | 37        | 425806             | 0.00               | 5843              | 5844  |
|              |                  | C26-75     | 468      | 52        | 333692             | 0.00               | 4254              | 4254  |
|              |                  | C28-75     | 751      | 44        | 293838             | 0.00               | 4935              | 4935  |
|              |                  | C29-75     | 2594     | 32        | 543850             | 0.00               | 6071              | 6071  |

| Cluster size | Vehicle capacity | Cluster ID | Column # | Vehicle # | Total distance (m) | Optimality gap (%) | Wall time (s)     |       |
|--------------|------------------|------------|----------|-----------|--------------------|--------------------|-------------------|-------|
|              |                  |            |          |           |                    |                    | Route enumeration | Total |
| 100          | 4                | C0-100     | 854      | 63        | 488119             | 0.00               | 34                | 34    |
|              |                  | C1-100     | 456      | 75        | 331497             | 0.00               | 31                | 31    |
|              |                  | C2-100     | 3802     | 46        | 596824             | 0.00               | 36                | 36    |
|              |                  | C3-100     | 4510     | 46        | 586434             | 0.00               | 35                | 36    |
|              |                  | C4-100     | 4232     | 44        | 558323             | 0.00               | 35                | 41    |
|              |                  | C5-100     | 732      | 70        | 366565             | 0.00               | 31                | 31    |
|              |                  | C6-100     | 2579     | 47        | 724844             | 0.00               | 35                | 35    |
|              |                  | C7-100     | 2020     | 53        | 661648             | 0.00               | 34                | 34    |
|              |                  | C8-100     | 1803     | 51        | 609120             | 0.00               | 34                | 34    |
|              |                  | C9-100     | 12034    | 40        | 527217             | 0.00               | 36                | 38    |
|              |                  | C10-100    | 1095     | 58        | 426386             | 0.00               | 34                | 34    |
|              |                  | C11-100    | 2374     | 51        | 427829             | 0.00               | 34                | 35    |
|              |                  | C12-100    | 989      | 62        | 413012             | 0.00               | 33                | 33    |
|              |                  | C13-100    | 909      | 61        | 483087             | 0.00               | 34                | 34    |
|              |                  | C14-100    | 4306     | 40        | 693825             | 0.00               | 35                | 40    |
|              |                  | C15-100    | 4605     | 48        | 790005             | 0.00               | 34                | 37    |
|              |                  | C16-100    | 1578     | 55        | 627423             | 0.00               | 33                | 33    |
|              |                  | C17-100    | 1151     | 60        | 640945             | 0.00               | 33                | 33    |
|              |                  | C18-100    | 952      | 58        | 681240             | 0.00               | 34                | 34    |
|              |                  | C19-100    | 2226     | 51        | 503252             | 0.00               | 34                | 35    |
|              |                  | C20-100    | 4254     | 46        | 569724             | 0.00               | 35                | 36    |
| C21-100      | 667              | 78         | 328216   | 0.00      | 32                 | 32                 |                   |       |
| 100          | 5                | C0-100     | 854      | 63        | 488119             | 0.00               | 1185              | 1186  |
|              |                  | C1-100     | 456      | 75        | 331497             | 0.00               | 1072              | 1072  |
|              |                  | C2-100     | 3910     | 46        | 596658             | 0.00               | 1356              | 1357  |
|              |                  | C3-100     | 4814     | 46        | 584077             | 0.00               | 1357              | 1359  |
|              |                  | C4-100     | 4487     | 44        | 552862             | 0.00               | 1298              | 1342  |
|              |                  | C5-100     | 735      | 70        | 366565             | 0.00               | 1034              | 1034  |
|              |                  | C6-100     | 2596     | 47        | 724844             | 0.00               | 1362              | 1362  |
|              |                  | C7-100     | 2043     | 53        | 661528             | 0.00               | 1326              | 1326  |
|              |                  | C8-100     | 1842     | 51        | 609038             | 0.00               | 1317              | 1317  |
|              |                  | C9-100     | 16749    | 40        | 519564             | 0.00               | 1419              | 1451  |
|              |                  | C10-100    | 1096     | 58        | 426386             | 0.00               | 1254              | 1254  |
|              |                  | C11-100    | 2418     | 51        | 427829             | 0.00               | 1320              | 1321  |
|              |                  | C12-100    | 990      | 62        | 413012             | 0.00               | 1208              | 1208  |
|              |                  | C13-100    | 912      | 61        | 483087             | 0.00               | 1221              | 1221  |
|              |                  | C14-100    | 4448     | 40        | 689319             | 0.00               | 1383              | 1457  |
|              |                  | C15-100    | 5985     | 48        | 788340             | 0.00               | 1287              | 1294  |
|              |                  | C16-100    | 1599     | 55        | 626787             | 0.00               | 1226              | 1227  |
|              |                  | C17-100    | 1155     | 60        | 640945             | 0.00               | 1218              | 1218  |
|              |                  | C18-100    | 953      | 58        | 681240             | 0.00               | 1292              | 1293  |
|              |                  | C19-100    | 2291     | 51        | 503252             | 0.00               | 1352              | 1352  |
|              |                  | C20-100    | 4761     | 46        | 568797             | 0.00               | 1352              | 1354  |
| C21-100      | 667              | 78         | 328216   | 0.00      | 1080               | 1080               |                   |       |
| 100          | 6                | C0-100     | 854      | 63        | 488119             | 0.00               | 25088             | 25088 |
|              |                  | C1-100     | 456      | 75        | 331497             | 0.00               | 20117             | 20117 |
|              |                  | C2-100     | 3917     | 46        | 596658             | 0.00               | 33455             | 33456 |
|              |                  | C3-100     | 4872     | 46        | 584048             | 0.00               | 33801             | 33802 |
|              |                  | C4-100     | 4510     | 44        | 552862             | 0.00               | 29993             | 30180 |
|              |                  | C5-100     | 735      | 70        | 366565             | 0.00               | 18613             | 18613 |
|              |                  | C6-100     | 2598     | 47        | 724844             | 0.00               | 43135             | 43136 |
|              |                  | C7-100     | 2043     | 53        | 661528             | 0.00               | 38791             | 38792 |
|              |                  | C8-100     | 1848     | 51        | 609038             | 0.00               | 39437             | 39437 |
|              |                  | C9-100     | 18758    | 40        | 517624             | 0.00               | 48359             | 48403 |
|              |                  | C10-100    | 1096     | 58        | 426386             | 0.00               | 36941             | 36941 |
|              |                  | C11-100    | 2419     | 51        | 427829             | 0.00               | 39761             | 39763 |
|              |                  | C12-100    | 990      | 62        | 413012             | 0.00               | 31038             | 31038 |
|              |                  | C13-100    | 912      | 61        | 483087             | 0.00               | 33881             | 33881 |
|              |                  | C14-100    | 4456     | 40        | 689319             | 0.00               | 41455             | 41492 |
|              |                  | C15-100    | 6939     | 48        | 788340             | 0.00               | 36980             | 36990 |
|              |                  | C16-100    | 1600     | 55        | 626787             | 0.00               | 32031             | 32031 |
|              |                  | C17-100    | 1155     | 60        | 640945             | 0.00               | 34810             | 34810 |
|              |                  | C18-100    | 953      | 58        | 681240             | 0.00               | 38501             | 38501 |
|              |                  | C19-100    | 2294     | 51        | 503252             | 0.00               | 42573             | 42574 |
|              |                  | C20-100    | 4898     | 46        | 568797             | 0.00               | 43900             | 43903 |
| C21-100      | 667              | 78         | 328216   | 0.00      | 29507              | 29507              |                   |       |

**Table 2 Results of BPA Scalability with Increasing Vehicle Capacity ( $\Delta = 10$  mins,  $R = 0.5$ ).**

| Cluster size | Vehicle capacity | Cluster ID | Inbound edge # | Outbound edge # | Tree node # | Column # | Vehicle # | Total distance (m) | Optimality gap (%) |                     | Integrality gap (%) | Wall time (s) |                 |                     |       |    |    |
|--------------|------------------|------------|----------------|-----------------|-------------|----------|-----------|--------------------|--------------------|---------------------|---------------------|---------------|-----------------|---------------------|-------|----|----|
|              |                  |            |                |                 |             |          |           |                    | Root node soln.    | Best feasible soln. |                     | RMP conv.     | Root node soln. | Best feasible soln. | Total |    |    |
| 4            | 4                | C0-75      | 1661           | 1565            | 15          | 462      | 47        | 356296             | 0.00               | 0.00                | 0.00                | 1             | 1               | 1                   | 1     |    |    |
|              |                  | C2-75      | 1906           | 1405            | 57          | 1043     | 40        | 643541             | 0.01               | 0.00                | 0.01                | 2             | 2               | 7                   | 12    |    |    |
|              |                  | C3-75      | 3099           | 1809            | 31          | 1247     | 38        | 487061             | 0.00               | 0.00                | 0.00                | 2             | 2               | 12                  | 13    |    |    |
|              |                  | C4-75      | 2052           | 1851            | 79          | 915      | 43        | 398265             | 0.01               | 0.00                | 0.01                | 1             | 1               | 8                   | 12    |    |    |
|              |                  | C5-75      | 823            | 810             | 1           | 267      | 61        | 230460             | 0.00               | 0.00                | 0.00                | 1             | 1               | 1                   | 1     |    |    |
|              |                  | C6-75      | 3427           | 2012            | 17          | 1420     | 36        | 451262             | 2.77               | 0.00                | 2.77                | 4             | 5               | 5                   | 16    |    |    |
|              |                  | C7-75      | 2458           | 1649            | 25          | 615      | 46        | 437743             | 2.17               | 0.00                | 2.17                | 1             | 1               | 1                   | 2     |    |    |
|              |                  | C8-75      | 3002           | 2183            | 27          | 1028     | 37        | 487561             | 2.69               | 0.00                | 2.69                | 2             | 2               | 11                  | 15    |    |    |
|              |                  | C9-75      | 3550           | 2341            | 428         | 2613     | 31        | 328525             | 3.22               | 0.00                | 3.21                | 7             | 8               | 493                 | 528   |    |    |
|              |                  | C10-75     | 2856           | 1580            | 151         | 2085     | 32        | 527544             | 3.11               | 0.00                | 3.11                | 11            | 11              | 168                 | 232   |    |    |
|              |                  | C11-75     | 1955           | 1193            | 23          | 639      | 47        | 443770             | 0.00               | 0.00                | 0.00                | 1             | 1               | 1                   | 2     |    |    |
|              |                  | C12-75     | 1801           | 1347            | 5           | 501      | 46        | 298162             | 0.00               | 0.00                | 0.00                | 1             | 1               | 1                   | 1     |    |    |
|              |                  | C13-75     | 2699           | 1302            | 141         | 1392     | 37        | 481869             | 2.70               | 0.00                | 2.70                | 2             | 2               | 17                  | 37    |    |    |
|              |                  | C14-75     | 2045           | 1332            | 17          | 626      | 47        | 301108             | 0.00               | 0.00                | 0.00                | 1             | 1               | 1                   | 2     |    |    |
|              |                  | C15-75     | 3007           | 1443            | 23          | 1098     | 36        | 460087             | 0.01               | 0.00                | 0.01                | 2             | 2               | 2                   | 11    |    |    |
|              |                  | C17-75     | 1492           | 835             | 3           | 404      | 50        | 348581             | 0.00               | 0.00                | 0.00                | 1             | 1               | 1                   | 1     |    |    |
|              |                  | C19-75     | 1497           | 664             | 1           | 390      | 57        | 245827             | 0.00               | 0.00                | 0.00                | 1             | 1               | 1                   | 1     |    |    |
|              |                  | C20-75     | 2323           | 1254            | 17          | 683      | 46        | 420825             | 0.00               | 0.00                | 0.00                | 1             | 1               | 2                   | 2     |    |    |
|              |                  | C22-75     | 3113           | 1524            | 119         | 1373     | 40        | 472247             | 2.49               | 0.00                | 2.49                | 2             | 2               | 17                  | 45    |    |    |
|              |                  | C23-75     | 2069           | 1548            | 169         | 1105     | 36        | 385434             | 5.53               | 0.00                | 5.53                | 2             | 2               | 28                  | 45    |    |    |
|              |                  | C24-75     | 2446           | 1694            | 305         | 1479     | 37        | 425807             | 2.70               | 0.00                | 2.69                | 2             | 3               | 72                  | 94    |    |    |
|              |                  | C26-75     | 1957           | 1039            | 17          | 432      | 52        | 333692             | 0.00               | 0.00                | 0.00                | 1             | 1               | 1                   | 1     |    |    |
|              |                  | C28-75     | 1781           | 1452            | 5           | 611      | 44        | 293838             | 0.00               | 0.00                | 0.00                | 1             | 1               | 1                   | 1     |    |    |
|              |                  | C29-75     | 2495           | 2238            | 1242        | 2217     | 32        | 548779             | 3.03               | 0.00                | 0.02                | 4             | 19              | 623                 | 805   |    |    |
|              |                  | 75         | 5              | C0-75           | 1661        | 1565     | 15        | 462                | 47                 | 356296              | 0.00                | 0.00          | 0.00            | 1                   | 1     | 1  | 1  |
|              |                  |            |                | C2-75           | 1906        | 1405     | 115       | 1085               | 40                 | 643540              | 0.02                | 0.00          | 0.01            | 2                   | 2     | 33 | 42 |
|              |                  |            |                | C3-75           | 3099        | 1809     | 37        | 1274               | 38                 | 487061              | 0.00                | 0.00          | 0.00            | 3                   | 3     | 22 | 24 |
|              |                  |            |                | C4-75           | 2052        | 1851     | 75        | 946                | 43                 | 398216              | 2.27                | 0.00          | 0.01            | 1                   | 2     | 14 | 19 |
|              |                  |            |                | C5-75           | 823         | 810      | 1         | 267                | 61                 | 230460              | 0.00                | 0.00          | 0.00            | 1                   | 1     | 1  | 1  |
| C6-75        | 3427             |            |                | 2012            | 39          | 1519     | 35        | 450414             | 2.85               | 0.00                | 2.85                | 48            | 48              | 107                 | 243   |    |    |
| C7-75        | 2458             |            |                | 1649            | 21          | 619      | 46        | 437743             | 2.17               | 0.00                | 2.17                | 1             | 1               | 1                   | 2     |    |    |
| C8-75        | 3002             |            |                | 2183            | 41          | 1049     | 37        | 487245             | 2.69               | 0.00                | 2.69                | 2             | 2               | 26                  | 27    |    |    |
| C9-75        | 3550             |            |                | 2341            | 399         | 2597     | 31        | 327993             | 3.22               | 0.00                | 3.22                | 14            | 15              | 721                 | 781   |    |    |
| C10-75       | 2856             |            |                | 1580            | 197         | 2350     | 32        | 526188             | 3.12               | 0.00                | 3.12                | 130           | 131             | 382                 | 1854  |    |    |
| C11-75       | 1955             |            |                | 1193            | 23          | 645      | 47        | 443770             | 0.00               | 0.00                | 0.00                | 1             | 1               | 1                   | 3     |    |    |
| C12-75       | 1801             |            |                | 1347            | 5           | 506      | 46        | 298162             | 0.00               | 0.00                | 0.00                | 1             | 1               | 1                   | 1     |    |    |
| C13-75       | 2699             |            |                | 1302            | 161         | 1367     | 37        | 479166             | 2.70               | 0.00                | 2.70                | 3             | 4               | 59                  | 67    |    |    |
| C14-75       | 2045             |            |                | 1333            | 21          | 626      | 47        | 301108             | 0.00               | 0.00                | 0.00                | 1             | 1               | 2                   | 3     |    |    |
| C15-75       | 3003             |            |                | 1443            | 35          | 1117     | 36        | 460087             | 0.01               | 0.00                | 0.01                | 3             | 3               | 3                   | 23    |    |    |
| C17-75       | 1492             |            |                | 835             | 3           | 404      | 50        | 348581             | 0.00               | 0.00                | 0.00                | 1             | 1               | 1                   | 1     |    |    |
| C19-75       | 1497             |            |                | 664             | 1           | 390      | 57        | 245827             | 0.00               | 0.00                | 0.00                | 1             | 1               | 1                   | 1     |    |    |
| C20-75       | 2323             |            |                | 1254            | 17          | 683      | 46        | 420825             | 0.00               | 0.00                | 0.00                | 1             | 1               | 2                   | 2     |    |    |
| C22-75       | 3113             |            |                | 1524            | 199         | 1399     | 40        | 472040             | 2.50               | 0.00                | 2.49                | 3             | 3               | 19                  | 105   |    |    |
| C23-75       | 2069             |            |                | 1548            | 25          | 983      | 35        | 379234             | 2.84               | 0.00                | 2.84                | 3             | 3               | 13                  | 18    |    |    |
| C24-75       | 2446             |            |                | 1694            | 705         | 1620     | 37        | 425806             | 5.25               | 0.00                | 2.70                | 3             | 6               | 109                 | 252   |    |    |
| C26-75       | 1957             |            |                | 1039            | 17          | 430      | 52        | 333692             | 0.00               | 0.00                | 0.00                | 1             | 1               | 1                   | 1     |    |    |
| C28-75       | 1781             |            |                | 1452            | 5           | 628      | 44        | 293838             | 0.00               | 0.00                | 0.00                | 1             | 1               | 1                   | 1     |    |    |
| C29-75       | 2495             |            |                | 2238            | 619         | 2097     | 32        | 543850             | 0.02               | 0.00                | 0.02                | 8             | 8               | 454                 | 578   |    |    |
| 75           | 6                |            |                | C0-75           | 1661        | 1565     | 15        | 462                | 47                 | 356296              | 0.00                | 0.00          | 0.00            | 1                   | 1     | 1  | 1  |
|              |                  |            |                | C2-75           | 1906        | 1405     | 87        | 1072               | 40                 | 643540              | 0.02                | 0.00          | 0.01            | 2                   | 3     | 27 | 39 |
|              |                  |            |                | C3-75           | 3099        | 1809     | 35        | 1281               | 38                 | 487061              | 0.00                | 0.00          | 0.00            | 4                   | 4     | 30 | 33 |
|              |                  |            |                | C4-75           | 2052        | 1851     | 75        | 929                | 43                 | 398216              | 2.27                | 0.00          | 0.01            | 2                   | 2     | 16 | 20 |
|              |                  |            |                | C5-75           | 823         | 810      | 1         | 267                | 61                 | 230460              | 0.00                | 0.00          | 0.00            | 1                   | 1     | 1  | 1  |
|              |                  | C6-75      | 3427           | 2012            | 53          | 1557     | 35        | 450414             | 2.85               | 0.00                | 2.85                | 42            | 42              | 224                 | 336   |    |    |
|              |                  | C7-75      | 2458           | 1649            | 29          | 617      | 46        | 437743             | 2.17               | 0.00                | 2.17                | 1             | 1               | 1                   | 2     |    |    |
|              |                  | C8-75      | 3002           | 2183            | 19          | 1019     | 37        | 487245             | 2.69               | 0.00                | 2.69                | 2             | 2               | 10                  | 14    |    |    |
|              |                  | C9-75      | 3550           | 2341            | 103         | 2127     | 31        | 327993             | 3.22               | 0.00                | 3.22                | 17            | 18              | 246                 | 339   |    |    |
|              |                  | C10-75     | 2856           | 1580            | 73          | 2029     | 32        | 525115             | 3.11               | 0.00                | 3.11                | 2763          | 2764            | 2764                | 17162 |    |    |
|              |                  | C11-75     | 1955           | 1193            | 23          | 648      | 47        | 443770             | 0.00               | 0.00                | 0.00                | 1             | 1               | 1                   | 3     |    |    |
|              |                  | C12-75     | 1801           | 1347            | 5           | 505      | 46        | 298162             | 0.00               | 0.00                | 0.00                | 1             | 1               | 1                   | 1     |    |    |
|              |                  | C13-75     | 2699           | 1302            | 369         | 1484     | 37        | 479166             | 2.70               | 0.00                | 2.70                | 5             | 5               | 88                  | 151   |    |    |
|              |                  | C14-75     | 2045           | 1333            | 15          | 620      | 47        | 301108             | 0.00               | 0.00                | 0.00                | 1             | 1               | 1                   | 2     |    |    |
|              |                  | C15-75     | 3007           | 1443            | 19          | 1061     | 36        | 460087             | 0.01               | 0.00                | 0.01                | 3             | 3               | 3                   | 13    |    |    |
|              |                  | C17-75     | 1492           | 835             | 5           | 411      | 50        | 348581             | 0.00               | 0.00                | 0.00                | 1             | 1               | 1                   | 1     |    |    |
|              |                  | C19-75     | 1497           | 664             | 1           | 390      | 57        | 245827             | 0.00               | 0.00                | 0.00                | 1             | 1               | 1                   | 1     |    |    |
|              |                  | C20-75     | 2323           | 1254            | 17          | 671      | 46        | 420825             | 0.00               | 0.00                | 0.00                | 1             | 1               | 2                   | 2     |    |    |
|              |                  | C22-75     | 3113           | 1524            | 141         | 1358     | 40        | 472040             | 2.50               | 0.00                | 2.49                | 3             | 4               | 53                  | 84    |    |    |
|              |                  | C23-75     | 2069           | 1548            | 35          | 981      | 35        | 379234             | 2.84               | 0.00                | 2.84                | 3             | 3               | 16                  | 26    |    |    |
|              |                  | C24-75     | 2446           | 1694            | 613         | 1572     | 37        | 425806             | 5.25               | 0.00                | 2.70                | 4             | 9               | 94                  | 256   |    |    |
|              |                  | C26-75     | 1957           | 1039            | 17          | 430      | 52        | 333692             | 0.00               | 0.00                | 0.00                | 1             | 1               | 1                   | 1     |    |    |
|              |                  | C28-75     | 1781           | 1452            | 5           | 622      | 44        | 293838             | 0.00               | 0.00                | 0.00                | 1             | 1               | 1                   | 1     |    |    |
|              |                  | C29-75     | 2495           | 2238            | 555         | 2050     | 32        | 543850             | 0.02               | 0.00                | 0.02                | 9             | 9               | 9                   | 667   |    |    |

| Cluster size | Vehicle capacity | Cluster ID | Inbound edge # | Outbound edge # | Tree node # | Column # | Vehicle # | Total distance (m) | Optimality gap (%) |                     | Integrality gap (%) | Wall time (s) |                 |                     |       |     |       |
|--------------|------------------|------------|----------------|-----------------|-------------|----------|-----------|--------------------|--------------------|---------------------|---------------------|---------------|-----------------|---------------------|-------|-----|-------|
|              |                  |            |                |                 |             |          |           |                    | Root node soln.    | Best feasible soln. |                     | RMP conv.     | Root node soln. | Best feasible soln. | Total |     |       |
| 75           | 7                | C0-75      | 1661           | 1565            | 15          | 463      | 47        | 356296             | 0.00               | 0.00                | 0.00                | 1             | 1               | 1                   | 1     |     |       |
|              |                  | C2-75      | 1906           | 1405            | 79          | 1072     | 40        | 643540             | 0.02               | 0.00                | 0.01                | 3             | 3               | 30                  | 39    |     |       |
|              |                  | C3-75      | 3099           | 1809            | 21          | 1238     | 38        | 487061             | 0.00               | 0.00                | 0.00                | 4             | 4               | 4                   | 20    |     |       |
|              |                  | C4-75      | 2052           | 1851            | 139         | 962      | 43        | 398216             | 2.27               | 0.00                | 0.01                | 1             | 2               | 33                  | 33    |     |       |
|              |                  | C5-75      | 823            | 810             | 1           | 267      | 61        | 230460             | 0.00               | 0.00                | 0.00                | 1             | 1               | 1                   | 1     |     |       |
|              |                  | C6-75      | 3427           | 2012            | 33          | 1515     | 35        | 450414             | 2.85               | 0.00                | 2.85                | 48            | 48              | 186                 | 247   |     |       |
|              |                  | C7-75      | 2458           | 1649            | 31          | 616      | 46        | 437743             | 2.17               | 0.00                | 2.17                | 1             | 1               | 1                   | 3     |     |       |
|              |                  | C8-75      | 3002           | 2183            | 23          | 1025     | 37        | 487245             | 2.69               | 0.00                | 2.69                | 2             | 2               | 9                   | 18    |     |       |
|              |                  | C9-75      | 3550           | 2341            | 189         | 2347     | 31        | 327993             | 3.22               | 0.00                | 3.22                | 20            | 20              | 482                 | 594   |     |       |
|              |                  | C10-75     | 2856           | 1580            | 2           | 1459     | 32        | 525115             | 3.12               | 3.12                | 3.12                | 39153         | 39154           | 39154               | 43200 |     |       |
|              |                  | C11-75     | 1955           | 1193            | 24          | 650      | 47        | 443770             | 0.00               | 0.00                | 0.00                | 1             | 1               | 1                   | 3     |     |       |
|              |                  | C12-75     | 1801           | 1347            | 5           | 502      | 46        | 298162             | 0.00               | 0.00                | 0.00                | 1             | 1               | 1                   | 1     |     |       |
|              |                  | C13-75     | 2699           | 1302            | 337         | 1470     | 37        | 479166             | 2.70               | 0.00                | 2.70                | 2             | 3               | 78                  | 105   |     |       |
|              |                  | C14-75     | 2045           | 1332            | 19          | 619      | 47        | 301108             | 0.00               | 0.00                | 0.00                | 1             | 1               | 2                   | 2     |     |       |
|              |                  | C15-75     | 3007           | 1443            | 25          | 1089     | 36        | 460087             | 0.01               | 0.00                | 0.01                | 2             | 3               | 3                   | 17    |     |       |
|              |                  | C17-75     | 1492           | 835             | 7           | 411      | 50        | 348581             | 0.00               | 0.00                | 0.00                | 1             | 1               | 1                   | 1     |     |       |
|              |                  | C19-75     | 1497           | 664             | 1           | 390      | 57        | 245827             | 0.00               | 0.00                | 0.00                | 1             | 1               | 1                   | 1     |     |       |
|              |                  | C20-75     | 2323           | 1254            | 11          | 672      | 46        | 420825             | 0.00               | 0.00                | 0.00                | 1             | 1               | 2                   | 2     |     |       |
|              |                  | C22-75     | 3113           | 1524            | 161         | 1382     | 40        | 472040             | 2.50               | 0.00                | 2.49                | 3             | 3               | 52                  | 79    |     |       |
|              |                  | C23-75     | 2069           | 1548            | 23          | 940      | 35        | 379234             | 2.84               | 0.00                | 2.84                | 3             | 3               | 12                  | 19    |     |       |
|              |                  | C24-75     | 2446           | 1694            | 745         | 1666     | 37        | 425806             | 5.25               | 0.00                | 2.70                | 3             | 6               | 148                 | 329   |     |       |
|              |                  | C26-75     | 1957           | 1039            | 17          | 430      | 52        | 333692             | 0.00               | 0.00                | 0.00                | 1             | 1               | 1                   | 1     |     |       |
|              |                  | C28-75     | 1781           | 1452            | 5           | 621      | 44        | 293838             | 0.00               | 0.00                | 0.00                | 1             | 1               | 1                   | 1     |     |       |
|              |                  | C29-75     | 2495           | 2238            | 523         | 2052     | 32        | 543850             | 0.02               | 0.00                | 0.02                | 7             | 8               | 8                   | 619   |     |       |
|              |                  | 75         | 8              | C0-75           | 1661        | 1565     | 15        | 461                | 47                 | 356296              | 0.00                | 0.00          | 0.00            | 1                   | 1     | 1   | 1     |
|              |                  |            |                | C2-75           | 1906        | 1405     | 75        | 1047               | 40                 | 643540              | 0.02                | 0.00          | 0.01            | 2                   | 2     | 26  | 36    |
|              |                  |            |                | C3-75           | 3099        | 1809     | 35        | 1268               | 38                 | 487061              | 0.00                | 0.00          | 0.00            | 4                   | 4     | 30  | 33    |
|              |                  |            |                | C4-75           | 2052        | 1851     | 101       | 928                | 43                 | 398216              | 0.01                | 0.00          | 0.01            | 2                   | 2     | 27  | 28    |
|              |                  |            |                | C5-75           | 823         | 810      | 1         | 267                | 61                 | 230460              | 0.00                | 0.00          | 0.00            | 1                   | 1     | 1   | 1     |
| C6-75        | 3427             |            |                | 2012            | 62          | 1584     | 35        | 450414             | 5.54               | 0.00                | 2.85                | 39            | 40              | 266                 | 362   |     |       |
| C7-75        | 2458             |            |                | 1649            | 31          | 618      | 46        | 437743             | 2.17               | 0.00                | 2.17                | 1             | 1               | 1                   | 2     |     |       |
| C8-75        | 3002             |            |                | 2183            | 49          | 1064     | 37        | 487245             | 2.69               | 0.00                | 2.69                | 3             | 4               | 9                   | 81    |     |       |
| C9-75        | 3550             |            |                | 2341            | 105         | 2199     | 31        | 327993             | 3.22               | 0.00                | 3.22                | 26            | 27              | 300                 | 398   |     |       |
| C10-75       | 2856             |            |                | 1580            | 1           | 1425     | 32        | 525207             | 3.12               | 3.12                | 3.12                | 84928         | 84928           | 84928               | 84928 |     |       |
| C11-75       | 1955             |            |                | 1193            | 24          | 641      | 47        | 443770             | 0.00               | 0.00                | 0.00                | 1             | 1               | 1                   | 3     |     |       |
| C12-75       | 1801             |            |                | 1347            | 5           | 508      | 46        | 298162             | 0.00               | 0.00                | 0.00                | 1             | 1               | 1                   | 1     |     |       |
| C13-75       | 2699             |            |                | 1302            | 427         | 1513     | 37        | 479166             | 2.70               | 0.00                | 2.70                | 4             | 4               | 77                  | 144   |     |       |
| C14-75       | 2045             |            |                | 1332            | 17          | 624      | 47        | 301108             | 0.00               | 0.00                | 0.00                | 1             | 1               | 1                   | 2     |     |       |
| C15-75       | 3005             |            |                | 1443            | 21          | 1093     | 36        | 460087             | 0.01               | 0.00                | 0.01                | 3             | 3               | 3                   | 16    |     |       |
| C17-75       | 1492             |            |                | 835             | 7           | 410      | 50        | 348581             | 0.00               | 0.00                | 0.00                | 1             | 1               | 1                   | 1     |     |       |
| C19-75       | 1497             |            |                | 664             | 1           | 390      | 57        | 245827             | 0.00               | 0.00                | 0.00                | 1             | 1               | 1                   | 1     |     |       |
| C20-75       | 2323             |            |                | 1254            | 11          | 671      | 46        | 420825             | 0.00               | 0.00                | 0.00                | 1             | 1               | 2                   | 2     |     |       |
| C22-75       | 3113             |            |                | 1524            | 161         | 1357     | 40        | 472040             | 2.50               | 0.00                | 2.49                | 3             | 4               | 65                  | 103   |     |       |
| C23-75       | 2069             |            |                | 1548            | 25          | 959      | 35        | 379234             | 2.84               | 0.00                | 2.84                | 4             | 4               | 16                  | 22    |     |       |
| C24-75       | 2446             |            |                | 1694            | 677         | 1567     | 37        | 425806             | 2.70               | 0.00                | 2.70                | 3             | 3               | 83                  | 265   |     |       |
| C26-75       | 1957             |            |                | 1039            | 15          | 430      | 52        | 333692             | 0.00               | 0.00                | 0.00                | 1             | 1               | 1                   | 1     |     |       |
| C28-75       | 1781             |            |                | 1452            | 5           | 620      | 44        | 293838             | 0.00               | 0.00                | 0.00                | 1             | 1               | 1                   | 1     |     |       |
| C29-75       | 2495             |            |                | 2238            | 573         | 2163     | 32        | 543850             | 0.02               | 0.00                | 0.02                | 9             | 9               | 353                 | 625   |     |       |
| 100          | 4                |            |                | C0-100          | 3488        | 1930     | 45        | 777                | 63                 | 488119              | 0.00                | 0.00          | 0.00            | 2                   | 2     | 2   | 5     |
|              |                  |            |                | C1-100          | 1825        | 1642     | 5         | 429                | 75                 | 331497              | 0.00                | 0.00          | 0.00            | 2                   | 2     | 2   | 3     |
|              |                  |            |                | C2-100          | 5540        | 3106     | 1445      | 2652               | 46                 | 596824              | 2.17                | 0.00          | 2.17            | 6                   | 7     | 995 | 1397  |
|              |                  |            |                | C3-100          | 5383        | 3127     | 823       | 2794               | 46                 | 586434              | 2.17                | 0.00          | 2.16            | 8                   | 9     | 558 | 695   |
|              |                  |            |                | C4-100          | 4211        | 2787     | 50653     | 6120               | 44                 | 558323              | 2.27                | 0.00          | 2.26            | 8                   | 9     | 730 | 31745 |
|              |                  | C5-100     | 1960           | 1452            | 39          | 575      | 70        | 366565             | 0.00               | 0.00                | 0.00                | 2             | 2               | 2                   | 4     |     |       |
|              |                  | C6-100     | 4708           | 3393            | 33          | 1805     | 47        | 724844             | 0.00               | 0.00                | 0.00                | 8             | 8               | 39                  | 44    |     |       |
|              |                  | C7-100     | 4120           | 2205            | 23          | 1227     | 53        | 661648             | 0.00               | 0.00                | 0.00                | 3             | 3               | 3                   | 10    |     |       |
|              |                  | C8-100     | 4952           | 2656            | 3           | 1285     | 51        | 609120             | 0.00               | 0.00                | 0.00                | 3             | 3               | 3                   | 4     |     |       |
|              |                  | C9-100     | 5664           | 3572            | 2316        | 6235     | 40        | 527217             | 2.50               | 0.00                | 2.49                | 57            | 59              | 7410                | 14795 |     |       |
|              |                  | C10-100    | 2995           | 2611            | 147         | 980      | 58        | 426386             | 1.72               | 0.00                | 1.72                | 2             | 2               | 14                  | 16    |     |       |
|              |                  | C11-100    | 4606           | 2964            | 61          | 1506     | 51        | 427829             | 0.00               | 0.00                | 0.00                | 3             | 4               | 14                  | 32    |     |       |
|              |                  | C12-100    | 2863           | 2459            | 1           | 794      | 62        | 413012             | 0.00               | 0.00                | 0.00                | 2             | 2               | 2                   | 2     |     |       |
|              |                  | C13-100    | 3232           | 2441            | 17          | 755      | 61        | 483087             | 0.00               | 0.00                | 0.00                | 2             | 2               | 3                   | 3     |     |       |
|              |                  | C14-100    | 4335           | 3403            | 2695        | 3757     | 40        | 693825             | 4.85               | 0.00                | 2.49                | 15            | 1297            | 3093                | 6348  |     |       |
|              |                  | C15-100    | 3711           | 2642            | 26493       | 3217     | 48        | 790005             | 4.16               | 0.00                | 4.16                | 7             | 8               | 2068                | 26100 |     |       |
|              |                  | C16-100    | 3278           | 2302            | 21          | 1085     | 55        | 627423             | 1.81               | 0.00                | 1.81                | 3             | 3               | 5                   | 8     |     |       |
|              |                  | C17-100    | 3413           | 1603            | 7           | 881      | 60        | 640945             | 0.00               | 0.00                | 0.00                | 2             | 2               | 2                   | 3     |     |       |
|              |                  | C18-100    | 3778           | 2518            | 81          | 872      | 58        | 681240             | 1.72               | 0.00                | 1.72                | 2             | 2               | 2                   | 10    |     |       |
|              |                  | C19-100    | 3722           | 3405            | 353         | 1656     | 51        | 503252             | 1.96               | 0.00                | 1.96                | 4             | 4               | 64                  | 192   |     |       |
|              |                  | C20-100    | 4377           | 2653            | 1863        | 2708     | 46        | 569724             | 2.17               | 0.00                | 2.17                | 7             | 7               | 1135                | 1144  |     |       |
| C21-100      | 2597             | 1223       | 1              | 524             | 78          | 328216   | 0.00      | 0.00               | 0.00               | 2                   | 2                   | 2             | 2               |                     |       |     |       |

| Cluster size | Vehicle capacity | Cluster ID | Inbound edge # | Outbound edge # | Tree node # | Column # | Vehicle # | Total distance (m) | Optimality gap (%) |                     | Integrity gap (%) | Wall time (s) |                 |                     |       |
|--------------|------------------|------------|----------------|-----------------|-------------|----------|-----------|--------------------|--------------------|---------------------|-------------------|---------------|-----------------|---------------------|-------|
|              |                  |            |                |                 |             |          |           |                    | Root node soln.    | Best feasible soln. |                   | RMP conv.     | Root node soln. | Best feasible soln. | Total |
| 5            | C0-100           | 3488       | 1930           | 43              | 772         | 63       | 488119    | 0.00               | 0.00               | 0.00                | 2                 | 2             | 2               | 5                   |       |
|              | C1-100           | 1825       | 1642           | 5               | 429         | 75       | 331497    | 0.00               | 0.00               | 0.00                | 2                 | 2             | 2               | 2                   |       |
|              | C2-100           | 5540       | 3106           | 1513            | 2637        | 46       | 596658    | 2.17               | 0.00               | 2.17                | 9                 | 10            | 1269            | 1942                |       |
|              | C3-100           | 5383       | 3127           | 191             | 2449        | 46       | 584077    | 2.17               | 0.00               | 2.16                | 60                | 61            | 860             | 950                 |       |
|              | C4-100           | 4209       | 2787           | 67              | 2111        | 44       | 552862    | 2.26               | 0.00               | 2.26                | 18                | 27            | 141             | 183                 |       |
|              | C5-100           | 1964       | 1452           | 47              | 586         | 70       | 366565    | 0.00               | 0.00               | 0.00                | 2                 | 2             | 2               | 4                   |       |
|              | C6-100           | 4708       | 3393           | 29              | 1807        | 47       | 724844    | 0.00               | 0.00               | 0.00                | 8                 | 8             | 26              | 54                  |       |
|              | C7-100           | 4120       | 2205           | 27              | 1234        | 53       | 661528    | 0.00               | 0.00               | 0.00                | 4                 | 4             | 4               | 13                  |       |
|              | C8-100           | 4952       | 2656           | 3               | 1287        | 51       | 609038    | 0.00               | 0.00               | 0.00                | 3                 | 3             | 3               | 5                   |       |
|              | C9-100           | 5559       | 3570           | 459             | 4860        | 40       | 521285    | 2.49               | 2.49               | 2.49                | 798               | 799           | 29422           | 43304               |       |
|              | C10-100          | 2995       | 2611           | 169             | 971         | 58       | 426386    | 1.72               | 0.00               | 1.72                | 2                 | 2             | 2               | 17                  |       |
|              | C11-100          | 4606       | 2964           | 53              | 1462        | 51       | 427829    | 0.00               | 0.00               | 0.00                | 4                 | 5             | 18              | 38                  |       |
|              | C12-100          | 2863       | 2459           | 1               | 787         | 62       | 413012    | 0.00               | 0.00               | 0.00                | 2                 | 2             | 2               | 2                   |       |
|              | C13-100          | 3232       | 2441           | 17              | 758         | 61       | 483087    | 0.00               | 0.00               | 0.00                | 2                 | 2             | 2               | 3                   |       |
|              | C14-100          | 4335       | 3403           | 1067            | 3293        | 40       | 690964    | 2.49               | 2.49               | 2.49                | 70                | 72            | 39918           | 43218               |       |
|              | C15-100          | 3711       | 2642           | 11238           | 4146        | 48       | 788340    | 4.16               | 4.16               | 4.16                | 22                | 22            | 4167            | 43205               |       |
|              | C16-100          | 3278       | 2302           | 65              | 1151        | 55       | 626787    | 1.81               | 0.00               | 1.81                | 2                 | 2             | 14              | 24                  |       |
|              | C17-100          | 3413       | 1603           | 19              | 902         | 60       | 640945    | 0.00               | 0.00               | 0.00                | 2                 | 2             | 2               | 5                   |       |
|              | C18-100          | 3778       | 2518           | 65              | 868         | 58       | 681240    | 1.72               | 0.00               | 1.72                | 2                 | 3             | 3               | 9                   |       |
|              | C19-100          | 3722       | 3405           | 633             | 1695        | 51       | 503252    | 1.96               | 0.00               | 1.96                | 4                 | 4             | 263             | 359                 |       |
| C20-100      | 4377             | 2653       | 1785           | 2948            | 46          | 568797   | 2.17      | 0.00               | 2.17               | 12                  | 13                | 1765          | 1815            |                     |       |
| C21-100      | 2597             | 1223       | 1              | 525             | 78          | 328216   | 0.00      | 0.00               | 0.00               | 2                   | 2                 | 2             | 2               |                     |       |
| 6            | C0-100           | 3488       | 1931           | 59              | 782         | 63       | 488119    | 0.00               | 0.00               | 0.00                | 2                 | 3             | 3               | 7                   |       |
|              | C1-100           | 1825       | 1642           | 5               | 429         | 75       | 331497    | 0.00               | 0.00               | 0.00                | 2                 | 2             | 2               | 2                   |       |
|              | C2-100           | 5540       | 3106           | 1439            | 2614        | 46       | 596658    | 2.17               | 0.00               | -2.17               | 10                | 11            | 1618            | 2309                |       |
|              | C3-100           | 5383       | 3127           | 415             | 2690        | 46       | 584048    | 2.17               | 0.00               | 2.16                | 76                | 77            | 1791            | 1841                |       |
|              | C4-100           | 4211       | 2787           | 309             | 2656        | 44       | 552862    | 2.26               | 0.00               | 2.26                | 21                | 24            | 178             | 773                 |       |
|              | C5-100           | 1959       | 1452           | 43              | 583         | 70       | 366565    | 0.00               | 0.00               | 0.00                | 2                 | 2             | 2               | 4                   |       |
|              | C6-100           | 4708       | 3393           | 27              | 1821        | 47       | 724844    | 0.00               | 0.00               | 0.00                | 11                | 11            | 30              | 85                  |       |
|              | C7-100           | 4120       | 2205           | 29              | 1243        | 53       | 661528    | 0.00               | 0.00               | 0.00                | 4                 | 4             | 4               | 15                  |       |
|              | C8-100           | 4952       | 2656           | 3               | 1277        | 51       | 609038    | 0.00               | 0.00               | 0.00                | 3                 | 3             | 3               | 4                   |       |
|              | C9-100           | 5664       | 3572           | 35              | 2997        | 40       | 518571    | 2.49               | 2.49               | 2.49                | 10273             | 10275         | 10275           | 43211               |       |
|              | C10-100          | 2995       | 2611           | 149             | 982         | 58       | 426386    | 1.72               | 0.00               | 1.72                | 2                 | 2             | 16              | 17                  |       |
|              | C11-100          | 4606       | 2964           | 45              | 1453        | 51       | 427829    | 0.00               | 0.00               | 0.00                | 4                 | 4             | 18              | 40                  |       |
|              | C12-100          | 2863       | 2459           | 1               | 790         | 62       | 413012    | 0.00               | 0.00               | 0.00                | 2                 | 2             | 2               | 2                   |       |
|              | C13-100          | 3232       | 2441           | 17              | 760         | 61       | 483087    | 0.00               | 0.00               | 0.00                | 2                 | 2             | 2               | 3                   |       |
|              | C14-100          | 4335       | 3403           | 532             | 3161        | 40       | 693512    | 2.50               | 2.50               | 2.50                | 144               | 148           | 21052           | 43203               |       |
|              | C15-100          | 3711       | 2642           | 3810            | 3876        | 48       | 788340    | 4.16               | 4.16               | 4.16                | 142               | 142           | 15775           | 43217               |       |
|              | C16-100          | 3278       | 2302           | 69              | 1151        | 55       | 626787    | 1.81               | 0.00               | 1.81                | 3                 | 3             | 3               | 41                  |       |
|              | C17-100          | 3411       | 1603           | 9               | 881         | 60       | 640945    | 0.00               | 0.00               | 0.00                | 2                 | 2             | 2               | 3                   |       |
|              | C18-100          | 3778       | 2518           | 59              | 867         | 58       | 681240    | 1.72               | 0.00               | 1.72                | 2                 | 2             | 2               | 8                   |       |
|              | C19-100          | 3722       | 3405           | 1364            | 1761        | 51       | 503252    | 1.96               | 0.00               | 1.96                | 5                 | 5             | 696             | 977                 |       |
| C20-100      | 4377             | 2653       | 2993           | 3190            | 46          | 568797   | 2.17      | 0.00               | 2.17               | 21                  | 22                | 3242          | 3252            |                     |       |
| C21-100      | 2597             | 1223       | 1              | 527             | 78          | 328216   | 0.00      | 0.00               | 0.00               | 2                   | 2                 | 2             | 2               |                     |       |
| 100          | C0-100           | 3488       | 1931           | 65              | 783         | 63       | 488119    | 0.00               | 0.00               | 0.00                | 2                 | 2             | 2               | 6                   |       |
|              | C1-100           | 1825       | 1642           | 5               | 429         | 75       | 331497    | 0.00               | 0.00               | 0.00                | 2                 | 2             | 2               | 2                   |       |
|              | C2-100           | 5540       | 3106           | 1613            | 2710        | 46       | 596658    | 2.17               | 0.00               | 2.17                | 11                | 12            | 1811            | 2822                |       |
|              | C3-100           | 5383       | 3127           | 247             | 2572        | 46       | 584048    | 2.17               | 0.00               | 2.16                | 68                | 69            | 1250            | 1297                |       |
|              | C4-100           | 4209       | 2787           | 87              | 2212        | 44       | 552334    | 2.26               | 0.00               | 2.26                | 13                | 15            | 220             | 240                 |       |
|              | C5-100           | 1959       | 1452           | 35              | 583         | 70       | 366565    | 0.00               | 0.00               | 0.00                | 2                 | 2             | 2               | 4                   |       |
|              | C6-100           | 4708       | 3393           | 27              | 1807        | 47       | 724844    | 0.00               | 0.00               | 0.00                | 11                | 11            | 29              | 82                  |       |
|              | C7-100           | 4120       | 2205           | 27              | 1209        | 53       | 661528    | 0.00               | 0.00               | 0.00                | 3                 | 4             | 4               | 13                  |       |
|              | C8-100           | 4952       | 2656           | 3               | 1270        | 51       | 609038    | 0.00               | 0.00               | 0.00                | 3                 | 3             | 3               | 4                   |       |
|              | C9-100           | 5664       | 3572           | 1               | 2482        | 40       | 520597    | 2.50               | 2.50               | 2.50                | 43846             | 43847         | 43847           | 43847               |       |
|              | C10-100          | 2995       | 2611           | 155             | 981         | 58       | 426386    | 1.72               | 0.00               | 1.72                | 2                 | 2             | 16              | 17                  |       |
|              | C11-100          | 4606       | 2964           | 57              | 1456        | 51       | 427829    | 0.00               | 0.00               | 0.00                | 5                 | 5             | 29              | 49                  |       |
|              | C12-100          | 2863       | 2459           | 1               | 793         | 62       | 413012    | 0.00               | 0.00               | 0.00                | 2                 | 2             | 2               | 2                   |       |
|              | C13-100          | 3232       | 2441           | 17              | 757         | 61       | 483087    | 0.00               | 0.00               | 0.00                | 2                 | 2             | 2               | 3                   |       |
|              | C14-100          | 4335       | 3403           | 369             | 2927        | 40       | 692956    | 2.49               | 2.49               | 2.49                | 240               | 242           | 242             | 43244               |       |
|              | C15-100          | 3711       | 2642           | 993             | 2445        | 48       | 789091    | 4.16               | 4.16               | 4.16                | 942               | 942           | 942             | 43215               |       |
|              | C16-100          | 3278       | 2302           | 63              | 1131        | 55       | 626787    | 1.81               | 0.00               | 1.81                | 4                 | 4             | 28              | 53                  |       |
|              | C17-100          | 3413       | 1603           | 9               | 875         | 60       | 640945    | 0.00               | 0.00               | 0.00                | 2                 | 2             | 2               | 3                   |       |
|              | C18-100          | 3778       | 2518           | 81              | 872         | 58       | 681240    | 1.72               | 0.00               | 1.72                | 2                 | 2             | 2               | 10                  |       |
|              | C19-100          | 3722       | 3405           | 639             | 1714        | 51       | 503252    | 1.96               | 0.00               | 1.96                | 5                 | 6             | 306             | 407                 |       |
| C20-100      | 4377             | 2653       | 1669           | 2890            | 46          | 568797   | 2.17      | 0.00               | 2.17               | 16                  | 17                | 1180          | 2009            |                     |       |
| C21-100      | 2597             | 1223       | 1              | 525             | 78          | 328216   | 0.00      | 0.00               | 0.00               | 2                   | 2                 | 2             | 2               |                     |       |
| 8            | C0-100           | 3488       | 1931           | 65              | 784         | 63       | 488119    | 0.00               | 0.00               | 0.00                | 2                 | 2             | 2               | 7                   |       |
|              | C1-100           | 1825       | 1642           | 5               | 429         | 75       | 331497    | 0.00               | 0.00               | 0.00                | 1                 | 1             | 1               | 2                   |       |
|              | C2-100           | 5540       | 3106           | 1477            | 2619        | 46       | 596658    | 2.17               | 0.00               | -2.17               | 13                | 13            | 1790            | 2605                |       |
|              | C3-100           | 5383       | 3127           | 71              | 2209        | 46       | 584048    | 2.17               | 0.00               | 2.16                | 90                | 91            | 389             | 518                 |       |
|              | C4-100           | 4210       | 2787           | 71              | 2176        | 44       | 552334    | 2.26               | 0.00               | 2.26                | 13                | 15            | 253             | 271                 |       |
|              | C5-100           | 1964       | 1452           | 53              | 575         | 70       | 366565    | 0.00               | 0.00               | 0.00                | 2                 | 2             | 2               | 5                   |       |
|              | C6-100           | 4708       | 3393           | 27              | 1822        | 47       | 724844    | 0.00               | 0.00               | 0.00                | 11                | 12            | 29              | 87                  |       |
|              | C7-100           | 4120       | 2205           | 29              | 1250        | 53       | 661528    | 0.00               | 0.00               | 0.00                | 3                 | 4             | 4               | 15                  |       |
|              | C8-100           | 4952       | 2656           | 3               | 1273        | 51       | 609038    | 0.00               | 0.00               | 0.00                | 3                 | 3             | 3               | 5                   |       |
|              | C9-100           | 5664       | 3572           | 4               | 2577        | 40       | 517627    | 2.49               | 2.49               | 2.49                | 34816             | 34818         | 34818           | 43200               |       |
|              | C10-100          | 2995       | 2611           | 159             | 976         | 58       | 426386    | 1.72               | 0.00               | 1.72                | 2                 | 2             | 16              | 18                  |       |
|              | C11-100          | 4606       | 2964           | 53              | 1457        | 51       | 427829    | 0.00               | 0.00               | 0.00                | 4                 | 5             | 19              | 45                  |       |
|              | C12-100          | 2863       | 2459           | 1               | 789         | 62       | 413012    | 0.00               | 0.00               | 0.00                | 2                 | 2             | 2               | 2                   |       |
|              | C13-100          | 3232       | 2441           | 13              | 760         | 61       | 483087    | 0.00               | 0.00               | 0.00                | 2                 | 2             | 2               | 3                   |       |
|              | C14-100          | 4060       | 3403           | 460             | 3150        | 40       | 693850    | 2.50               | 2.50               | 2.50                | 196               | 198           | 33298           | 43354               |       |
|              | C15-100          | 3711       | 2642           | 321             | 2353        | 48       | 789091    | 4.16               | 4.16               | 4.16                | 2597              | 2598          | 2598            | 44157               |       |
|              | C16-100          | 3278       | 2302           | 29              | 1116        | 55       | 626787    | 1.81               | 0.00               | 1.81                | 4                 | 4             | 13              | 32                  |       |
|              | C17-100          | 3413       | 1603           | 9               | 873         | 60       | 640945    | 0.00               | 0.00               | 0.00                | 2                 | 2             | 2               | 3                   |       |
|              | C18-100          | 3778       | 2518           | 71              | 871         | 58       | 681240    | 1.72               | 0.00               | 1.72                | 2                 | 2             | 2               | 9                   |       |
|              | C19-100          | 3722       | 3405           | 719             | 1709        | 51       | 503252    | 1.96               | 0.00               | 1.96                | 5                 | 5             | 394             | 487                 |       |
| C20-100      | 4377             | 2653       | 1760           | 2899            | 46          | 568797   | 2.17      | 0.00               | 2.17               | 21                  | 22                | 1737          | 2192            |                     |       |
| C21-100      | 2597             | 1223       | 1              | 524             | 78          | 328216   | 0.00      | 0.00               | 0.00               | 1                   | 2                 | 2             | 2               |                     |       |

**Table 3** Results of REA Scalability with Increasing Cluster Size ( $K = 4$ ,  $\Delta = 10$  mins,  $R = 0.5$ ).

| Cluster size | Cluster ID | Column # | Vehicle # | Total distance (m) | Optimality gap (%) | Wall time (s)     |       |
|--------------|------------|----------|-----------|--------------------|--------------------|-------------------|-------|
|              |            |          |           |                    |                    | Route enumeration | Total |
| 200          | C0-200     | 2286     | 129       | 702670             | 0.00               | 618               | 618   |
|              | C1-200     | 10955    | 84        | 1122469            | 0.00               | 653               | 654   |
|              | C2-200     | 15149    | 85        | 1067503            | 0.00               | 646               | 2361  |
|              | C3-200     | 3101     | 113       | 824730             | 0.00               | 629               | 630   |
|              | C4-200     | 2627     | 114       | 684981             | 0.00               | 632               | 878   |
|              | C5-200     | 22061    | 80        | 937514             | 0.00               | 660               | 744   |
|              | C6-200     | 11844    | 86        | 1136870            | 0.00               | 673               | 680   |
|              | C7-200     | 16235    | 76        | 1365475            | 0.00               | 668               | 1165  |
|              | C8-200     | 27913    | 78        | 923290             | 0.49               | 684               | 43211 |
|              | C9-200     | 5289     | 99        | 1055393            | 0.00               | 655               | 702   |
| C10-200      | 7790       | 87       | 1249784   | 0.00               | 676                | 8731              |       |
| 300          | C0-300     | 33262    | 118       | 1652972            | 0.16               | 3301              | 43206 |
|              | C1-300     | 32536    | 119       | 1928887            | 0.44               | 2796              | 43203 |
|              | C2-300     | 7994     | 150       | 1096341            | 0.00               | 3249              | 4367  |
|              | C3-300     | 36568    | 113       | 1511806            | 0.00               | 3499              | 3650  |
|              | C4-300     | 15394    | 134       | 1477823            | 0.13               | 3198              | 43205 |
|              | C5-300     | 22072    | 124       | 1773852            | 0.00               | 3342              | 4325  |
|              | C6-300     | 33541    | 119       | 1927882            | 0.35               | 3191              | 43205 |
|              | C7-300     | 6554     | 157       | 1105570            | 0.00               | 3152              | 3158  |
|              | C8-300     | 53120    | 114       | 1418494            | 0.20               | 3129              | 43204 |
|              | C9-300     | 30568    | 114       | 1911085            | 0.17               | 2258              | 43203 |
|              | C10-300    | 6370     | 156       | 1085481            | 0.00               | 2736              | 2776  |
|              | C11-300    | 34630    | 118       | 1903034            | 0.37               | 3037              | 43204 |
| C12-300      | 7137       | 153      | 1067479   | 0.00               | 2339               | 2632              |       |
| 400          | C0-400     | 28968    | 180       | 1617748            | 0.00               | 8897              | 35048 |
|              | C1-400     | 52194    | 145       | 1901974            | 0.19               | 6972              | 43203 |
|              | C2-400     | 28025    | 173       | 1627074            | 0.00               | 10060             | 18906 |
|              | C3-400     | 41012    | 152       | 2114911            | 0.20               | 7842              | 43203 |
|              | C4-400     | 26314    | 182       | 1687079            | 0.00               | 10447             | 10531 |
|              | C5-400     | 53948    | 151       | 1988361            | 0.00               | 7043              | 12685 |
|              | C6-400     | 26109    | 173       | 1640438            | 0.00               | 10716             | 10986 |
| C7-400       | 68190      | 145      | 1887086   | 0.32               | 7117               | 43202             |       |

**Table 4 Results of BPA Scalability with Increasing Cluster Size ( $K = 4$ ,  $\Delta = 10$  mins,  $R = 0.5$ ).**

| Cluster size | Cluster ID | Inbound edge # | Outbound edge # | Tree node # | Column # | Vehicle # | Total distance (m) | Optimality gap (%) |                     | Integrality gap (%) | Wall time (s) |                 |                     |       |
|--------------|------------|----------------|-----------------|-------------|----------|-----------|--------------------|--------------------|---------------------|---------------------|---------------|-----------------|---------------------|-------|
|              |            |                |                 |             |          |           |                    | Root node soln.    | Best feasible soln. |                     | RMP conv.     | Root node soln. | Best feasible soln. | Total |
| 200          | C0-200     | 10281          | 5900            | 113         | 1747     | 129       | 702670             | 1.55               | 0.00                | 1.55                | 13            | 13              | 35                  | 40    |
|              | C1-200     | 17096          | 10087           | 5870        | 6121     | 84        | 1122544            | 3.50               | 2.37                | 2.37                | 59            | 96              | 6951                | 43201 |
|              | C2-200     | 13922          | 9341            | 7479        | 7506     | 85        | 1067640            | 2.35               | 2.34                | 2.34                | 55            | 74              | 6263                | 43203 |
|              | C3-200     | 10551          | 7643            | 99          | 2272     | 113       | 824730             | 0.00               | 0.00                | 0.00                | 19            | 20              | 20                  | 78    |
|              | C4-200     | 9806           | 8163            | 5901        | 2616     | 114       | 684981             | 1.75               | 0.00                | 1.75                | 17            | 31              | 2896                | 4149  |
|              | C5-200     | 18385          | 10756           | 3695        | 9115     | 80        | 937514             | 1.26               | 1.25                | 1.25                | 111           | 121             | 14244               | 43203 |
|              | C6-200     | 16047          | 9533            | 13563       | 9572     | 86        | 1136870            | 2.29               | 1.16                | 1.16                | 45            | 202             | 14218               | 43201 |
|              | C7-200     | 15672          | 11696           | 2279        | 8993     | 76        | 1367209            | 3.88               | 2.62                | 2.62                | 140           | 6148            | 23012               | 43213 |
|              | C8-200     | 16483          | 12874           | 1           | 6027     | 79        | 928401             | 2.53               | 2.53                | 2.53                | 319           | 43209           | 43209               | 43209 |
|              | C9-200     | 14587          | 9841            | 15783       | 4425     | 99        | 1055393            | 1.01               | 0.00                | 1.00                | 25            | 37              | 6671                | 20722 |
| C10-200      | 15459      | 11600          | 4244            | 6328        | 87       | 1249965   | 2.29               | 2.29               | 2.29                | 45                  | 150           | 9471            | 43202               |       |
| 300          | C0-300     | 38471          | 31409           | 242         | 11624    | 118       | 1665487            | 0.85               | 0.85                | 0.85                | 900           | 1018            | 1018                | 43265 |
|              | C1-300     | 36931          | 22949           | 496         | 12533    | 119       | 1938007            | 2.52               | 2.52                | 2.52                | 944           | 4151            | 4151                | 43229 |
|              | C2-300     | 26167          | 20901           | 11208       | 6629     | 150       | 1096341            | 1.33               | 1.33                | 1.33                | 81            | 124             | 7967                | 43200 |
|              | C3-300     | 35614          | 23695           | 762         | 13192    | 114       | 1510444            | 1.75               | 1.75                | 1.75                | 426           | 12864           | 12864               | 43212 |
|              | C4-300     | 30651          | 26297           | 1091        | 8757     | 134       | 1478291            | 1.49               | 1.49                | 1.49                | 278           | 519             | 39914               | 43243 |
|              | C5-300     | 32453          | 25677           | 400         | 9653     | 125       | 1772096            | 0.80               | 0.80                | 0.80                | 622           | 14460           | 14460               | 43259 |
|              | C6-300     | 35954          | 20702           | 483         | 12056    | 119       | 1934456            | 2.52               | 2.52                | 2.52                | 734           | 1914            | 1914                | 43218 |
|              | C7-300     | 24094          | 19880           | 3185        | 5592     | 157       | 1105570            | 1.26               | 0.00                | 0.64                | 70            | 1027            | 3841                | 10016 |
|              | C8-300     | 38059          | 22799           | 255         | 12441    | 115       | 1423615            | 2.60               | 2.60                | 2.60                | 480           | 29027           | 29027               | 43201 |
|              | C9-300     | 33512          | 23617           | 779         | 13090    | 114       | 1934405            | 2.64               | 2.64                | 2.64                | 515           | 666             | 666                 | 43252 |
|              | C10-300    | 22339          | 16909           | 23037       | 5367     | 156       | 1085482            | 0.64               | 0.64                | 0.64                | 63            | 70              | 7449                | 43202 |
|              | C11-300    | 34544          | 21130           | 698         | 12376    | 118       | 1910713            | 3.38               | 3.38                | 3.38                | 568           | 988             | 988                 | 43227 |
| C12-300      | 24520      | 17238          | 12001           | 6091        | 153      | 1067479   | 0.65               | 0.65               | 0.65                | 88                  | 124           | 4043            | 43200               |       |
| 400          | C0-400     | 49218          | 39758           | 1           | 10357    | 181       | 1613436            | 1.65               | 1.65                | 1.65                | 528           | 43205           | 43205               | 43205 |
|              | C1-400     | 53747          | 35507           | 1           | 13136    | 147       | 1926300            | 2.72               | 2.72                | 2.72                | 751           | 43207           | 43207               | 43207 |
|              | C2-400     | 54300          | 35489           | 675         | 12751    | 173       | 1631283            | 1.16               | 1.16                | 1.16                | 406           | 540             | 540                 | 43223 |
|              | C3-400     | 55542          | 42004           | 1           | 12834    | 153       | 2124836            | 1.96               | 1.96                | 1.96                | 1596          | 43204           | 43204               | 43204 |
|              | C4-400     | 49195          | 31033           | 3523        | 11881    | 182       | 1688282            | 1.10               | 1.10                | 1.10                | 222           | 239             | 25641               | 43201 |
|              | C5-400     | 57633          | 34496           | 1           | 13557    | 152       | 1983300            | 1.97               | 1.97                | 1.97                | 684           | 43204           | 43204               | 43204 |
|              | C6-400     | 46155          | 30320           | 3708        | 12494    | 173       | 1640472            | 1.16               | 1.15                | 1.15                | 240           | 289             | 11566               | 43210 |
| C7-400       | 61393      | 38346          | 1               | 14833       | 146      | 1886534   | 2.73               | 2.73               | 2.73                | 960                 | 43206         | 43206           | 43206               |       |

**Table 5** Results of Root-Node Heuristics with  $t_{RMP} = 8$  mins and  $t_{MIP} = 2$  mins ( $K = 4$ ,  $\Delta = 10$  mins,  $R = 0.5$ ).

| Cluster size | Cluster ID | Enforce forbidden paths |           |                    |               |       | Relax forbidden paths |                     |           |                    |               |     |
|--------------|------------|-------------------------|-----------|--------------------|---------------|-------|-----------------------|---------------------|-----------|--------------------|---------------|-----|
|              |            | Column #                | Vehicle # | Optimality gap (%) | Wall time (s) |       | Column #              | Infeasible column # | Vehicle # | Optimality gap (%) | Wall time (s) |     |
|              |            |                         |           |                    | RMP           | MIP   |                       |                     |           |                    | RMP           | MIP |
| 100          | C0-100     | 720                     | 63        | 0.00               | 2             | 0     | 720                   | 0                   | 63        | 0.00               | 2             | 0   |
|              | C1-100     | 422                     | 75        | 0.00               | 2             | 0     | 423                   | 0                   | 75        | 0.00               | 2             | 0   |
|              | C2-100     | 1828                    | 46        | 2.17               | 5             | 0     | 1792                  | 6                   | 46        | 4.35               | 4             | 0   |
|              | C3-100     | 1735                    | 46        | 2.17               | 4             | 0     | 1729                  | 6                   | 46        | 2.17               | 4             | 0   |
|              | C4-100     | 1653                    | 44        | 2.27               | 6             | 5     | 1624                  | 4                   | 44        | 2.27               | 5             | 1   |
|              | C5-100     | 537                     | 70        | 0.00               | 1             | 0     | 541                   | 0                   | 70        | 0.00               | 2             | 0   |
|              | C6-100     | 1637                    | 47        | 0.00               | 5             | 0     | 1628                  | 3                   | 47        | 0.00               | 4             | 0   |
|              | C7-100     | 1130                    | 53        | 0.00               | 2             | 0     | 1123                  | 5                   | 53        | 0.00               | 2             | 0   |
|              | C8-100     | 1198                    | 52        | 1.92               | 2             | 0     | 1184                  | 3                   | 51        | 0.00               | 2             | 0   |
|              | C9-100     | 2360                    | 41        | 4.88               | 29            | 10    | 2467                  | 10                  | 41        | 4.88               | 37            | 2   |
|              | C10-100    | 891                     | 58        | 1.72               | 2             | 0     | 895                   | 1                   | 58        | 1.72               | 2             | 0   |
|              | C11-100    | 1272                    | 51        | 0.00               | 3             | 0     | 1252                  | 0                   | 51        | 0.00               | 2             | 0   |
|              | C12-100    | 767                     | 62        | 0.00               | 2             | 0     | 776                   | 2                   | 62        | 0.00               | 2             | 0   |
|              | C13-100    | 708                     | 61        | 0.00               | 2             | 0     | 708                   | 0                   | 61        | 0.00               | 1             | 0   |
|              | C14-100    | 2003                    | 41        | 4.88               | 11            | 2     | 1994                  | 12                  | 41        | 4.88               | 8             | 2   |
|              | C15-100    | 1548                    | 48        | 4.17               | 3             | 0     | 1580                  | 9                   | 48        | 6.25               | 4             | 0   |
|              | C16-100    | 992                     | 55        | 1.82               | 2             | 0     | 988                   | 2                   | 55        | 1.82               | 2             | 0   |
|              | C17-100    | 817                     | 60        | 0.00               | 2             | 0     | 810                   | 3                   | 60        | 0.00               | 2             | 0   |
|              | C18-100    | 808                     | 58        | 1.72               | 2             | 0     | 808                   | 0                   | 58        | 1.72               | 1             | 0   |
|              | C19-100    | 1337                    | 51        | 1.96               | 3             | 0     | 1334                  | 9                   | 52        | 3.85               | 3             | 0   |
|              | C20-100    | 1672                    | 46        | 2.17               | 4             | 1     | 1643                  | 2                   | 46        | 2.17               | 4             | 1   |
| C21-100      | 500        | 78                      | 0.00      | 2                  | 0             | 503   | 0                     | 78                  | 0.00      | 1                  | 0             |     |
| 200          | C0-200     | 1537                    | 129       | 1.55               | 12            | 0     | 1539                  | 2                   | 129       | 1.55               | 12            | 0   |
|              | C1-200     | 4216                    | 85        | 3.53               | 35            | 1     | 4146                  | 19                  | 84        | 2.38               | 35            | 2   |
|              | C2-200     | 4019                    | 85        | 2.35               | 34            | 2     | 4018                  | 16                  | 85        | 3.53               | 33            | 3   |
|              | C3-200     | 2029                    | 113       | 0.00               | 13            | 0     | 2022                  | 4                   | 113       | 0.00               | 13            | 0   |
|              | C4-200     | 2017                    | 114       | 1.75               | 14            | 0     | 2039                  | 4                   | 114       | 1.75               | 13            | 0   |
|              | C5-200     | 5161                    | 80        | 1.25               | 82            | 9     | 5010                  | 29                  | 81        | 2.47               | 48            | 35  |
|              | C6-200     | 4294                    | 87        | 2.30               | 28            | 1     | 4315                  | 18                  | 87        | 2.30               | 25            | 3   |
|              | C7-200     | 5516                    | 76        | 2.63               | 81            | 67    | 5563                  | 38                  | 77        | 3.90               | 63            | 12  |
|              | C8-200     | 5925                    | 79        | 2.53               | 245           | 120   | 5986                  | 29                  | 79        | 2.53               | 209           | 120 |
|              | C9-200     | 3142                    | 99        | 1.01               | 16            | 2     | 3165                  | 8                   | 99        | 1.01               | 17            | 1   |
| C10-200      | 4118       | 87                      | 2.30      | 38                 | 5             | 4150  | 10                    | 87                  | 2.30      | 30                 | 3             |     |
| 300          | C0-300     | 9312                    | 119       | 1.68               | 449           | 120   | 9366                  | 58                  | 119       | 1.68               | 235           | 120 |
|              | C1-300     | 9928                    | 119       | 2.52               | 376           | 120   | 9795                  | 44                  | 120       | 4.17               | 171           | 114 |
|              | C2-300     | 4879                    | 150       | 1.33               | 63            | 5     | 4894                  | 3                   | 150       | 1.33               | 62            | 6   |
|              | C3-300     | 9465                    | 114       | 1.75               | 286           | 62    | 9530                  | 43                  | 116       | 3.45               | 264           | 120 |
|              | C4-300     | 7002                    | 134       | 1.49               | 192           | 8     | 7021                  | 24                  | 134       | 1.49               | 113           | 14  |
|              | C5-300     | 7920                    | 125       | 0.80               | 296           | 120   | 7832                  | 30                  | 125       | 1.60               | 142           | 19  |
|              | C6-300     | 9495                    | 119       | 2.52               | 433           | 28    | 9531                  | 70                  | 119       | 3.36               | 157           | 14  |
|              | C7-300     | 4311                    | 158       | 1.27               | 63            | 4     | 4298                  | 3                   | 158       | 1.27               | 55            | 1   |
|              | C8-300     | 9726                    | 116       | 3.45               | 243           | 120   | 9756                  | 31                  | 115       | 2.61               | 219           | 120 |
|              | C9-300     | 9796                    | 115       | 3.48               | 401           | 120   | 9835                  | 55                  | 115       | 3.48               | 304           | 120 |
|              | C10-300    | 3884                    | 156       | 0.64               | 50            | 2     | 3915                  | 8                   | 156       | 1.28               | 49            | 1   |
|              | C11-300    | 9354                    | 119       | 4.20               | 303           | 120   | 9685                  | 51                  | 118       | 4.24               | 196           | 26  |
| C12-300      | 4207       | 153                     | 0.65      | 59                 | 1             | 4285  | 6                     | 153                 | 0.65      | 53                 | 1             |     |
| 400          | C0-400     | 10289                   | 181       | 1.66               | 356           | 120   | 10355                 | 27                  | 182       | 2.20               | 318           | 120 |
|              | C1-400     | 12853                   | 152       | 5.92               | 417           | 120   | 12965                 | 42                  | 151       | 5.30               | 419           | 120 |
|              | C2-400     | 9989                    | 173       | 1.16               | 185           | 42    | 10112                 | 19                  | 173       | 1.16               | 203           | 21  |
|              | C3-400     | 12615                   | 155       | 11.61              | 486           | 120   | 12714                 | 44                  | 157       | 4.46               | 472           | 120 |
|              | C4-400     | 8872                    | 182       | 1.10               | 153           | 18    | 8948                  | 22                  | 183       | 2.19               | 146           | 26  |
|              | C5-400     | 13162                   | 154       | 3.25               | 415           | 120   | 13248                 | 45                  | 153       | 2.61               | 443           | 120 |
|              | C6-400     | 8971                    | 173       | 1.16               | 155           | 70    | 9130                  | 28                  | 173       | 1.73               | 159           | 25  |
| C7-400       | 14322      | 150                     | 6.67      | 504                | 120           | 14412 | 64                    | 152                 | 6.58      | 461                | 120           |     |
